# Supplementary material
Source: PubMed Central journal article supplement (PMC4607757)

# Supplementary data, Figure 1

A

Alignment of IGPR-1 with Mouse TMIGD1 (overall homology: 31 %)

```

IGPR-1  ----M-GSPGM-V--LGLLVQIWA-L-Q-EASS-LSVQQG--PN-LLQVRQGSQATLVCQV 46
TMIGD1  MVWKITG-P-LQACQL-LLV-VLSLTPQGRSSVLTVN-GRTENYILDTQHGVQASLECAV 55

IGPR-1  DQ-ATA-WERLRVKW-TKDGAILCQPYITNGS-LSL-GVC-GPQGRLSWQAPS--HLT- 96
TMIGD1  -QNHTED-EEL-L-WYREDG-IV-D--LKNGNKINISSVCVSP---IN-ESDNGVRFTCK 103

IGPR-1  LQLD-PVSLNHSGAYVCWAAVEIPELEEAEGN-I-TRLFVDPDDPTQNRNRIASFPGFLF 153
TMIGD1  LQRDQTVSV--T-V-VL-N-VTFPPL--LSGNGFQT---VE-E----NSD-V-S----L- 140

IGPR-1  VLLGVGSMGVAIVW----GAW-F-WGRRSCQQ-RDSGNSPGNAF-YSNVLYRPRGPPKK 205
TMIGD1  VC-NVKSNPQAQMMWYKNNSALVLEKGRHQIHQTRES-----FQLS-IT-KV----KK 186

IGPR-1  SED----C-SGEG-K-DQRG-QSIYSTS-FPQPAPRQPHLASRPC---P-SPR-PC-PS 250
TMIGD1  SDNGTYSCIASSSLKMETMDFHLLVKDKVFMVPA--EPIIAA--CVVVVLTMAFALF-SR 241

IGPR-1  RPHGHPVSMVRV-SPR--P-SPTQ-QPRPKGF PKVGEE 282
TMIGD1  RK-R-I-M-KLCGKKNDPNS ETAL----- 261
    
```

B

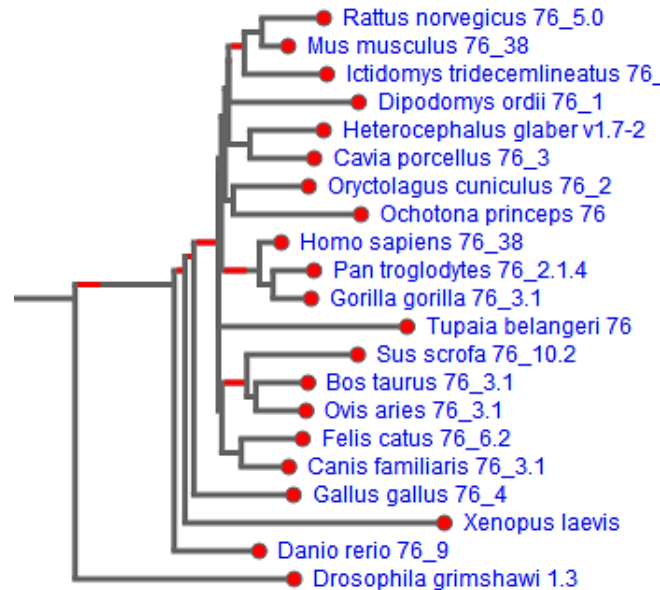

Supplement: mmc1.pdf [file mmc1.pdf]
