# Supplementary material
Source: PubMed Central journal article supplement (PMC4607757)

## Supplementary data, Figure 2

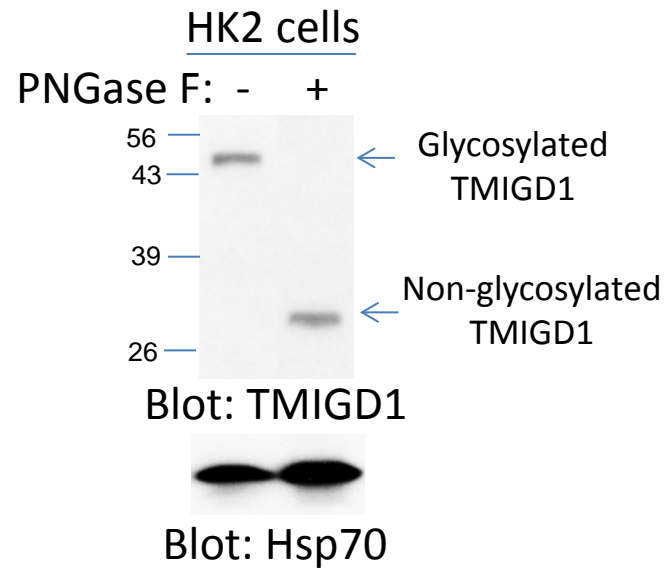

Supplement: mmc2.pdf [file mmc2.pdf]

Supplementary data, Figure 3

A

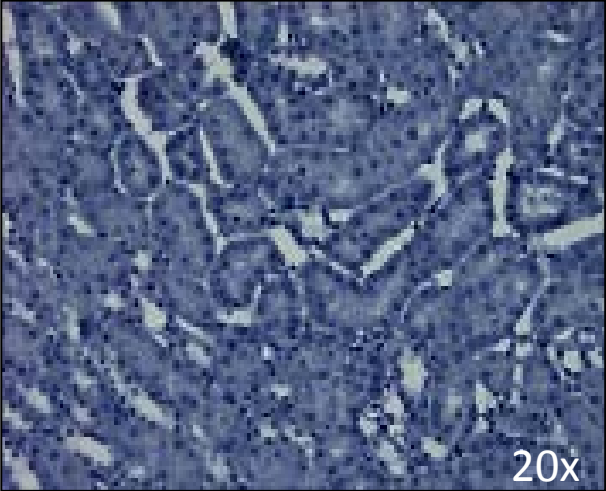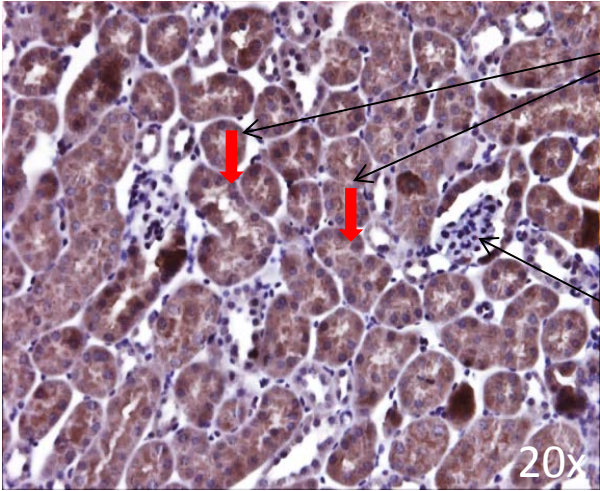

Proximal Tubules

Glomerulus

B

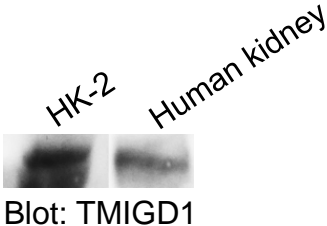

C

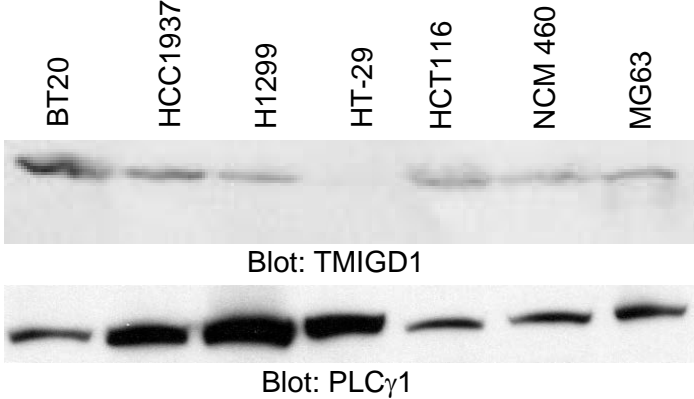

Supplement: mmc3.pdf [file mmc3.pdf]

# Supplementary data, Figure 4

A

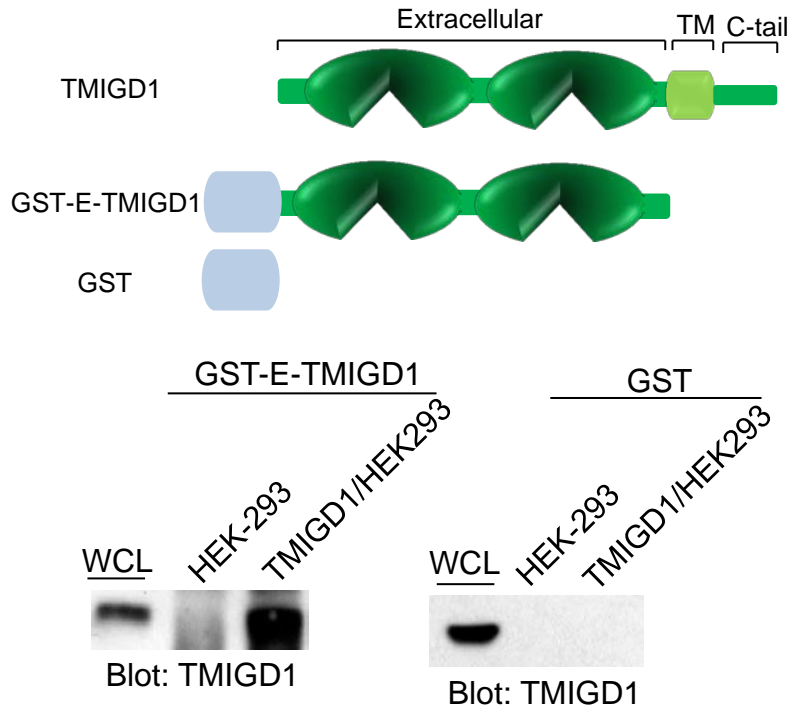

B

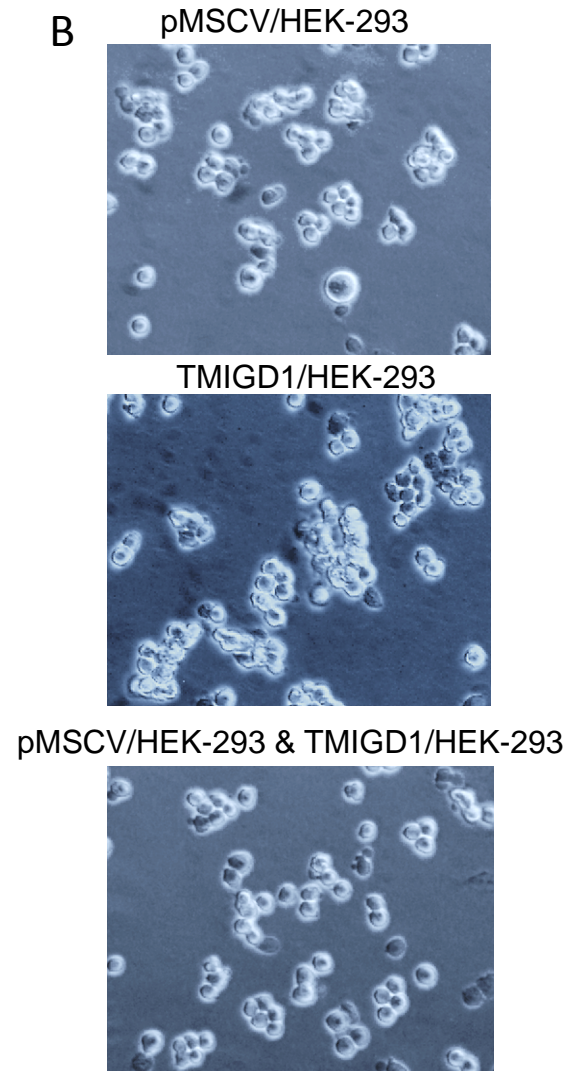

Supplement: mmc4.pdf [file mmc4.pdf]

## Supplementary data, Figure 5

**A**

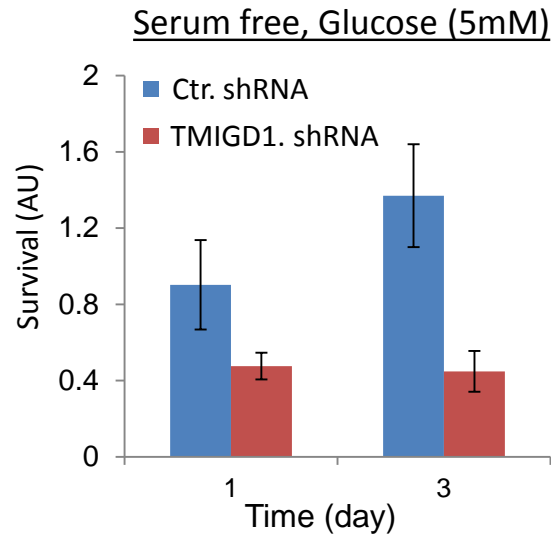

**B**

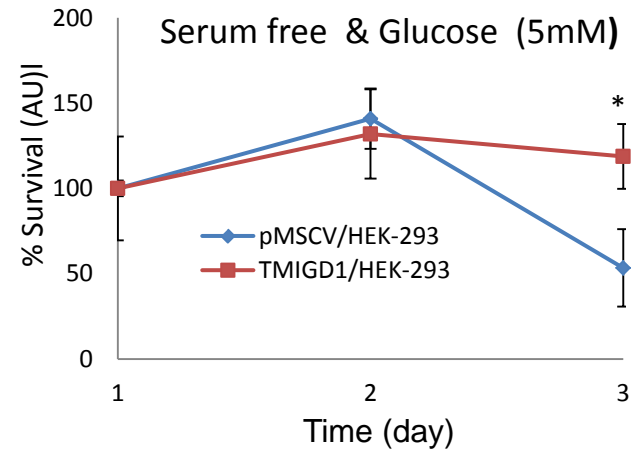

Supplement: mmc5.pdf [file mmc5.pdf]
